# Supplementary material
Source: PubMed Central journal article supplement (PMC3999202)
Supplement: NIHMS564152-supplement-Supplementary_Information.pdf [file NIHMS564152-supplement-Supplementary_Information.pdf]

# SUPPLEMENTARY INFORMATION

## A proteome-driven elucidation of adaptive responses to combined vitamin E and C deficiency in zebrafish

*Ievgen V. Motorykin<sup>1</sup>, Maret G. Traber<sup>2</sup>, Robert L. Tanguay<sup>3</sup>, and Claudia S. Maier<sup>1\*</sup>*

<sup>1</sup>Department of Chemistry, Oregon State University, Corvallis, OR 97331, U.S.A

<sup>2</sup>Linus Pauling Institute and <sup>3</sup>School of Biological and Population Health Sciences,  
Oregon State University, Corvallis, OR 97331, U.S.A

<sup>3</sup>Department of Environmental and Molecular Toxicology, Oregon State University,  
Corvallis, OR 97331, U.S.A

**Supplementary Table S1.** Pipetting scheme used for sample lysis and preparation of digests.

**Supplementary Table S2.** Synapt G2 HDMS instrument settings used for Ion-Mobility-MS<sup>E</sup> acquisitions.

**Supplementary Table S3.** The number of peptides and proteins found in each of the biological samples subjected to LC-IM-MS<sup>E</sup>.

**Supplementary Table S4.** Proteins identified in the E-C<sup>+</sup> and the E-C<sup>-</sup> groups, GO annotations and fold-changes observed in the vitamin C deficient fish (E-C<sup>-</sup>/E-C<sup>+</sup> transition).

**Excel file: Supplementary Table S5.** Protein Table for Study (A) E+C<sup>+</sup> vs E+C<sup>-</sup> and (B) E-C<sup>+</sup> vs E-C<sup>-</sup>. The compilation of proteins found in each samples, unique peptides identified per protein and respective sequence coverage.

**Supplementary Figure S1.** Design of the feeding experiment. Briefly, at 42 day of age, 40 fish were divided in two groups and fed diets low in vitamin C with vitamin E at sufficient or deficient levels. Thus, two vitamin groups were created: E+C<sup>-</sup> and E-C<sup>-</sup> with 20 fish in each group. Supplementation continued for 56 days, after which half of the fish population in each group was harvested. The diet of remaining fish was altered to have a high amount of vitamin C, thus creating another two vitamin groups: E+C<sup>+</sup> and E-C<sup>+</sup>. After an additional 21 days, the fish were harvested. Thus, four groups with 10 fish in each were created, each having different vitamins levels that varied with supplementation: E+C<sup>+</sup>, E-C<sup>+</sup>, E+C<sup>-</sup> and E-C<sup>-</sup>.

**Supplemental Figure S2.** Workflow used for preparing the samples for the label-free “bottom up” quantitative proteomics study.

Fish was individually ground under liquid nitrogen using a mortar and pestle. While still dry, the fish powder was transferred to a pre-weighted microcentrifuge tube and the mass of the tube with fish powder was recorded. The mass of the fish was calculated by the difference. A PBS solution with ProteaseMAX (0.04%) was added to the micro tubes for the extraction of proteins; its volume was adjusted to account for fish mass variability. Assuming the density of extraction solution 1 mg/mL, its mass was calculated as 6 times that of a fish. Tubes of fish powder solution were frozen in liquid nitrogen for 2 minutes, thawed for 5 min, and sonicated for 15 minutes. Last three steps were repeated three times. After lysis, tubes were centrifuged at 4 °C for 10 minutes at 15,000 relative centrifugal force (rcf) and the supernatants were transferred to new microcentrifuge tubes (1.3 mL). After protein digestion, 9 µL of digest was mixed with 1 µL of the internal standard and the mixture was subjected to LC- ion mobility – MS<sup>E</sup> analysis.

**Supplementary Figure S3.** Fish characteristics dependent on the vitamin regime fed.

(A) Boxplots of distribution of fish body weight. Fish from vitamin groups were harvested at preselected age (98 days vs. 119 days) and had a different vitamin supplementation.

Therefore it was expected that there will be a difference between the average fish mass between groups. The median fish mass is lower for groups with a shorter life span, but the difference was statistically significant only between E+C+ and E-C- groups (p-value=0.006).

(B) The ratios of median growth rate between vitamins groups. Ratios representing the effect of vitamin E deficiency are colored in green and those representing the effect of vitamin C are

in blue. The growth rate (median body mass / age) of fish adequate in both vitamins (E+C+ group) was approximately 3-times higher compared to the group deficient in both vitamins (E-C- group). Vitamin C deficiency seemed to have a more drastic effect on the growth rate compared to inadequate vitamin E levels.

**Supplemental Figure S4.** A boxplot of the distribution of the total protein concentration after extraction and lysis.

Total protein concentrations were distributed in a narrow range, as was expected with the sample preparation that accounts for differences in fish mass. The median of total protein concentration was 2.382 mg/mL, sample size=37.

**Supplementary Figure S5.** Gradient profiles with respective base peak chromatograms.

To yield the maximum number of eluted peptides, a LC gradient was optimized. For this, a sample was run using different LC gradients and the number of eluted peptides was compared. By changing the mobile phase composition over time, the gradient was optimized after each run to make the elution of peptides even across a chromatogram and to reduce peptide coelution. The gradients were named “Gradient1”, “Gradient2”, “Gradient3” and “Gradient4”. The comparison of the total ion chromatograms illustrates how different clusters of eluting compounds are moving across the chromatogram allowing better separation of peptides dependent on the gradient design.

**Supplementary Figure S6.** Venn’s diagrams comparing the number of peptides eluting from a column and identified with LC-IM-MS<sup>E</sup>.

More identified peptides means more identified proteins with greater probability. Gradient 4 (3% to 40% B in 90 minutes) was chosen for further peptide separation.

**Supplementary Figure S7.** Correlation plot between E-C+ sample 9 and E-C+ sample 8.

On the axis is  $\log_2$  of the concentration of proteins found in both groups. 95% confidence band is drawn with short-dashed line, 95% prediction band is long-dashed line. Adjusted  $R^2$  shows some variability between biological replicates.

**Supplementary Figure S8.** Correlation plot matrix of the E-C+ group.

As expected, variation between fish was observed and the correlation is stronger between samples, where the number of proteins found is higher.

**Supplementary Figure S9.** The responsive protein network for the vitamin transition C+/C- and both groups deficient in vitamin E status (E-C+ vs E-C-). The network was constructed using proteins observed in the quantitative proteomics screens of fish adequate in vitamin C versus fish deficient in vitamin C both with deficient vitamin E status (transition E-C+ /E-C- ). In the network each node represents a protein found in either group E-C+ or E-C-. The change in protein amounts between vitamin C adequate and deficient fish is color coded: green nodes represent proteins that increased their amounts, red represent those that decreased, and grey nodes show proteins that were not quantified. The size of a node represents an average of the protein abundance estimate in E-C- group. The width of a line connecting proteins represents the strength of proteins interaction, as extracted from STRING. Proteins involved in glycolysis, the TCA cycle, stress response and heat shock proteins are highlighted.

**Supplementary Table S1.** Protocol for sample lysis and preparation of digests.

| Sample   | Fish weight, mg | Solubilization/Lysis          |                              |                             |                                        | Preparation of Digests              |                                               |                                                     |
|----------|-----------------|-------------------------------|------------------------------|-----------------------------|----------------------------------------|-------------------------------------|-----------------------------------------------|-----------------------------------------------------|
|          |                 | Volume of pMAX, $\mu\text{L}$ | Volume of PBS, $\mu\text{L}$ | Total volume, $\mu\text{L}$ | Concentration, $\mu\text{g}/\text{mL}$ | Volume for digestion, $\mu\text{L}$ | Mass of proteins for digestion, $\mu\text{g}$ | Volume of $\text{NH}_4\text{HCO}_3$ , $\mu\text{l}$ |
| C+E+ #3  | 62.0            | 74                            | 298                          | 372                         | 2080.0                                 | 24.0                                | 49.9                                          | 69.5                                                |
| C+E+ #4  | 115.0           | 138                           | 552                          | 690                         | 2642.6                                 | 18.9                                | 49.9                                          | 74.6                                                |
| C+E+ #5  | 29.2            | 35                            | 140                          | 175                         | 1682.1                                 | 29.7                                | 50.0                                          | 63.8                                                |
| C+E+ #6  | 143.4           | 172                           | 688                          | 860                         | 845.1                                  | 59.2                                | 50.0                                          | 34.3                                                |
| C+E+ #7  | 231.0           | 277                           | 1109                         | 1386                        | 2423.0                                 | 20.6                                | 49.9                                          | 72.9                                                |
| C+E+ #8  | 207.3           | 249                           | 995                          | 1244                        | 2217.2                                 | 22.6                                | 50.1                                          | 70.9                                                |
| C+E+ #9  | 242.7           | 291                           | 1165                         | 1456                        | 2148.6                                 | 23.3                                | 50.1                                          | 70.2                                                |
| C+E+ #10 | 183.5           | 220                           | 881                          | 1101                        | 1942.8                                 | 25.7                                | 49.9                                          | 67.8                                                |
| C+E- #1  | 127.6           | 153                           | 612                          | 765                         | 2217.2                                 | 22.6                                | 50.1                                          | 70.9                                                |
| C+E- #2  | 81.2            | 97                            | 390                          | 487                         | 707.9                                  | 70.6                                | 50.0                                          | 22.9                                                |
| C+E- #3  | 58.9            | 71                            | 283                          | 354                         | 2477.9                                 | 20.2                                | 50.1                                          | 73.3                                                |
| C+E- #4  | 103.1           | 124                           | 495                          | 619                         | 2587.7                                 | 19.3                                | 49.9                                          | 74.2                                                |
| C+E- #5  | 124.1           | 149                           | 596                          | 745                         | 2464.2                                 | 20.3                                | 50.0                                          | 73.2                                                |
| C+E- #6  | 71.8            | 86                            | 345                          | 431                         | 2697.5                                 | 18.5                                | 49.9                                          | 75.0                                                |
| C+E- #7  | 65.8            | 79                            | 316                          | 395                         | 2656.3                                 | 18.8                                | 49.9                                          | 74.7                                                |
| C+E- #8  | 207.6           | 249                           | 996                          | 1245                        | 2258.8                                 | 22.1                                | 49.9                                          | 71.4                                                |
| C+E- #9  | 123.8           | 149                           | 594                          | 743                         | 2299.5                                 | 21.7                                | 49.9                                          | 71.8                                                |
| C+E- #10 | 215.3           | 258                           | 1033                         | 1291                        | 2381.9                                 | 21.0                                | 50.0                                          | 72.5                                                |
| C-E+ #1  | 32.5            | 39                            | 156                          | 195                         | 2450.5                                 | 20.4                                | 50.0                                          | 73.1                                                |
| C-E+ #2  | 201.9           | 242                           | 969                          | 1211                        | 2313.3                                 | 21.6                                | 50.0                                          | 71.9                                                |
| C-E+ #3  | 168.8           | 203                           | 810                          | 1013                        | 2258.4                                 | 22.1                                | 49.9                                          | 71.4                                                |
| C-E+ #4  | 41.1            | 49                            | 197                          | 246                         | 2409.3                                 | 20.8                                | 50.1                                          | 72.7                                                |
| C-E+ #5  | 70.1            | 84                            | 336                          | 420                         | 2464.2                                 | 20.3                                | 50.0                                          | 73.2                                                |
| C-E+ #6  | 168.2           | 202                           | 807                          | 1009                        | 2327.0                                 | 21.5                                | 50.0                                          | 72.0                                                |
| C-E+ #7  | 51.1            | 61                            | 245                          | 306                         | 2519.1                                 | 19.8                                | 49.9                                          | 73.7                                                |
| C-E+ #8  | 42.7            | 51                            | 205                          | 256                         | 2656.3                                 | 18.8                                | 49.9                                          | 74.7                                                |
| C-E+ #9  | 73.1            | 88                            | 351                          | 439                         | 2327.0                                 | 21.5                                | 50.0                                          | 72.0                                                |
| C-E+ #10 | 76.9            | 92                            | 369                          | 461                         | 2368.2                                 | 21.1                                | 50.0                                          | 72.4                                                |
| C-E- #1  | 72.4            | 87                            | 348                          | 435                         | 1983.9                                 | 25.2                                | 50.0                                          | 68.3                                                |
| C-E- #2  | 14.9            | 18                            | 72                           | 90                          | 2711.2                                 | 18.4                                | 49.9                                          | 75.1                                                |
| C-E- #3  | 87.8            | 105                           | 421                          | 526                         | 2409.3                                 | 20.8                                | 50.1                                          | 72.7                                                |

|         |       |     |     |     |        |      |      |      |
|---------|-------|-----|-----|-----|--------|------|------|------|
| C-E- #4 | 34.8  | 42  | 167 | 209 | 2464.2 | 20.3 | 50.0 | 73.2 |
| C-E- #5 | 40.0  | 48  | 192 | 240 | 2423.0 | 20.6 | 49.9 | 72.9 |
| C-E- #6 | 19.7  | 24  | 95  | 119 | 2327.0 | 21.5 | 50.0 | 72.0 |
| C-E- #7 | 73.4  | 88  | 352 | 440 | 2532.8 | 19.7 | 49.9 | 73.8 |
| C-E- #8 | 31.7  | 38  | 152 | 190 | 2834.7 | 17.6 | 49.9 | 75.9 |
| C-E- #9 | 111.4 | 134 | 535 | 669 | 2299.5 | 21.7 | 49.9 | 71.8 |

**Supplementary Table S2.** Synapt G2 HDMS instrument settings used for the ion-mobility-MS<sup>E</sup> acquisitions.

|                                                     |       |
|-----------------------------------------------------|-------|
| Capillary voltage, kV                               | 2.5   |
| Sampling cone                                       | 40    |
| Extraction cone                                     | 4.2   |
| Source temperature, °C                              | 40    |
| Desolvation temperature, °C                         | 300   |
| Cone gas flow, L/Hr                                 | 20    |
| Nanoflow gas pressure, Bar                          | 1     |
| Purge gas flow, mL/Hr                               | 100   |
| Desolvation gas flow, L/Hr                          | 100   |
| IMS gas flow, mL/min                                | 75.30 |
| Reference scan frequency, sec                       | 60    |
| LockSpray capillary, kV                             | 3.0   |
| Use manual trap DC                                  | FALSE |
| Use manual IMS DC                                   | FALSE |
| Use manual transfer DC                              | FALSE |
| Source manual control                               | OFF   |
| Trap manual control                                 | OFF   |
| IMS manual control                                  | OFF   |
| Transfer manual control                             | OFF   |
| <b>Function parameters – Function 1</b>             |       |
| Trap collision energy, eV                           | 6.0   |
| Transfer collision energy, eV                       | 0.0   |
| Maintain mobility separation                        | YES   |
| <b>Function parameters – Function 2</b>             |       |
| Using auto trap MS collision energy, eV             | 4.0   |
| Transfer MS collision energy low, eV                | 27.0  |
| Transfer MS collision energy high, eV               | 50.0  |
| Maintain mobility separation                        | YES   |
| <b>Function parameters – Function 3 (Lock Mass)</b> |       |
| Using auto trap MS collision energy, eV             | 4.0   |
| Using auto transfer MS collision energy, eV         | 0.0   |
| Maintain mobility separation                        | YES   |



**Supplementary Table S3.** The number of proteins, peptides and spectra found in biological samples, as extracted from Scaffold software.

| Category | Bio Sample | #Prot | #Pept | #Spec |
|----------|------------|-------|-------|-------|
| E-C+     | B1         | 50    | 138   | 3341  |
| E-C+     | B2         | 197   | 1263  | 37888 |
| E-C+     | B3         | 185   | 1164  | 26128 |
| E-C+     | B4         | 109   | 373   | 8439  |
| E-C+     | B5         | 74    | 217   | 5770  |
| E-C+     | B6         | 63    | 306   | 3156  |
| E-C+     | B7         | 99    | 345   | 8833  |
| E-C+     | B8         | 167   | 1016  | 16434 |
| E-C+     | B9         | 159   | 845   | 11886 |
| E-C+     | B10        | 140   | 793   | 10109 |
| E-C-     | D1         | 110   | 441   | 11595 |
| E-C-     | D2         | 104   | 389   | 7832  |
| E-C-     | D3         | 94    | 509   | 6751  |
| E-C-     | D4         | 99    | 431   | 9345  |
| E-C-     | D5         | 138   | 797   | 9668  |
| E-C-     | D6         | 134   | 842   | 8257  |
| E-C-     | D7         | 72    | 255   | 13220 |
| E-C-     | D8         | 74    | 357   | 3632  |
| E-C-     | D9         | 133   | 827   | 8665  |
| E+C+     | A3         | 153   | 811   | 8920  |
| E+C+     | A4         | 64    | 273   | 4447  |
| E+C+     | A5         | 162   | 735   | 12179 |
| E+C+     | A6         | 102   | 239   | 12038 |
| E+C+     | A7         | 183   | 1000  | 17021 |
| E+C+     | A8         | 178   | 821   | 16849 |
| E+C+     | A9         | 127   | 405   | 9551  |
| E+C+     | A10        | 61    | 44    | 1581  |
| E+C-     | C1         | 101   | 401   | 12201 |
| E+C-     | C2         | 152   | 536   | 14657 |
| E+C-     | C3         | 68    | 93    | 2717  |
| E+C-     | C4         | 125   | 340   | 12040 |
| E+C-     | C5         | 125   | 488   | 9672  |
| E+C-     | C6         | 112   | 295   | 7091  |
| E+C-     | C7         | 151   | 596   | 27808 |
| E+C-     | C8         | 143   | 568   | 10600 |
| E+C-     | C9         | 129   | 441   | 8682  |

E+C-

C10

||

49

48

648

**Supplementary Table S4.** Proteins identified in the E-C+ and the E-C- groups, GO annotations and fold-changes observed in the vitamin C deficient fish (E-C-/E-C+ transition).

| Accession number                    | Protein name                                                  | Gene name | Ave E-C+,<br>fmol | Fold<br>change |
|-------------------------------------|---------------------------------------------------------------|-----------|-------------------|----------------|
| <b>Glycolysis cycle</b>             |                                                               |           |                   |                |
| Q6DG54                              | Pyruvate kinase                                               | pkm2b     | 45.29             | **0.43         |
| Q6P043                              | Fructose-bisphosphate aldolase                                | aldoab    | 19.00             | *1.57          |
| Q7ZW73                              | Fructose-bisphosphate aldolase                                | aldob     | 39.04             | 0.85           |
| Q803Q7                              | Fructose-bisphosphate aldolase                                | aldoaa    | 78.28             | 0.44           |
| Q7SXW7                              | Phosphoglucomutase 1                                          | pgm1      | 23.81             | 0.53           |
| Q7ZV29                              | Phosphoglycerate kinase                                       | pgk1      | 27.86             | 0.85           |
| <b>TCA cycle</b>                    |                                                               |           |                   |                |
| Q6PEI6                              | Aconitase 2, mitochondrial                                    | aco2      | 10.48             | 1.05           |
| Q7T334                              | Malate dehydrogenase                                          | mdh2      | 28.84             | 0.77           |
| Q801E6                              | Malate dehydrogenase                                          | mdh1a     | 19.01             | 1.13           |
| Q7ZUP6                              | Isocitrate dehydrogenase 2 (NADP+), mitochondrial             | idh2      | 37.54             | 0.73           |
| B2GTW6                              | Citrate synthase                                              | cs        | 22.32             | 0.89           |
| <b>Glutaminolysis</b>               |                                                               |           |                   |                |
| Q6P3L9                              | Glutamate dehydrogenase 1                                     | glud1b    | 15.59             | *2.12          |
| Q7ZVJ4                              | L-lactate dehydrogenase                                       | ldha      | 24.75             | 1.13           |
| Q803U5                              | L-lactate dehydrogenase                                       | ldhba     | 13.76             | 0.97           |
| <b>Structural molecule activity</b> |                                                               |           |                   |                |
| Q8JIY5                              | Glial fibrillary acidic protein                               | gfap      | 1.19              | **27.82        |
| Q90441                              | Desmin                                                        | desma     | 12.24             | 1.62           |
| A8WGN0                              | Keratin 8                                                     | krt8      | 36.64             | 1.72           |
| Q9PUB5                              | Type II cytokeratin                                           | krt5      | 13.41             | 0.68           |
| Q9PUB6                              | Type I cytokeratin                                            | cki       | 4.75              | 1.42           |
| Q9PWD8                              | Type I cytokeratin                                            | cyt1      | 6.42              | 0.58           |
| Q1LXJ1                              | Novel protein similar to type I cytokeratin, enveloping layer | krt17     | 19.37             | 2.34           |

|        |                                                                                                                   |                                     |                             |        |        |
|--------|-------------------------------------------------------------------------------------------------------------------|-------------------------------------|-----------------------------|--------|--------|
| Q6DHB6 | Zgc:92533                                                                                                         |                                     | zgc:92533                   | 53.76  | 0.40   |
|        |                                                                                                                   | <b>ATP binding (not functional)</b> |                             |        |        |
| Q9PTF5 | Nucleoside diphosphate kinase                                                                                     |                                     | nme2b.1                     | 28.46  | 1.80   |
| Q7SXL4 | Nucleoside diphosphate kinase                                                                                     |                                     | nme2b.2                     | 535.05 | 1.11   |
| A0JMC2 | Myhz2 protein (Fragment)                                                                                          |                                     | myhz2                       | 2.44   | 0.73   |
| A2BGX8 | Novel protein similar to myosin heavy chain 4 (Myhc4) (Fragment)                                                  |                                     | CH211-<br>251M3.3-<br>001   | 4.93   | 2.95   |
| A7E2L9 | LOC100002040 protein (Fragment)                                                                                   |                                     | myhb                        | 1.93   | *5.96  |
| A8WBZ8 | Slow myosin heavy chain 3 (Fragment)                                                                              |                                     | smyhc3                      | 2.98   | 1.07   |
| B6IDE1 | Slow myosin heavy chain 2                                                                                         |                                     | smyhc2                      | 33.18  | 1.23   |
| B8A559 | Novel myosin family protein (Fragment)                                                                            |                                     | CH211-<br>158M24.10-<br>001 | 10.63  | *5.90  |
| B8A561 | Novel myosin family protein                                                                                       |                                     | myhz1.2                     | 2.42   | 4.48   |
| O93409 | Myosin light chain 2                                                                                              |                                     | mylz2                       | 363.78 | 1.33   |
| Q508P7 | Fast myosin heavy chain 4                                                                                         |                                     | myhc4                       | 65.68  | 0.25   |
| Q9I8U7 | Fast skeletal muscle myosin light polypeptide 3                                                                   |                                     | mylz3                       | 89.46  | 1.56   |
| Q7T1B8 | Fast skeletal myosin heavy chain 3 (Fragment)                                                                     |                                     | myhz1.2                     | 4.39   | 1.30   |
| Q6P0G6 | Novel protein similar to vertebrate myosin, light chain 6, alkali, smooth muscle and non-muscle (MYL6, zgc:77231) |                                     | myl1                        | 39.60  | 1.17   |
| Q9PVE1 | Ventricular myosin heavy chain                                                                                    |                                     | vmhc                        | 17.21  | **4.19 |
| A7E2H1 | Zgc:152732 protein (Fragment)                                                                                     |                                     | vmhcl                       | 22.92  | 0.80   |
| A0JMP4 | ATPase, Ca <sup>++</sup> transporting, cardiac muscle, fast twitch 1 like                                         |                                     | atp2a1l                     | 29.87  | 0.82   |
| Q08BA1 | ATP synthase subunit alpha                                                                                        |                                     | atp5a1                      | 42.54  | 0.61   |
| Q4VBK0 | ATP synthase subunit beta                                                                                         |                                     | atp5b                       | 14.01  | 1.26   |
| Q6ZM60 | Novel protein similar to vertebrate ATPase, Ca <sup>++</sup> transporting, cardiac muscle, slow twitch 2 (ATP2A2) |                                     | atp2a2b                     | 2.61   | 1.81   |
| Q7ZW18 | ATPase, Ca <sup>++</sup> transporting, cardiac muscle, slow twitch 2a                                             |                                     | atp2a2a                     | 10.65  | 0.62   |
| Q8UUJ8 | Stress protein HSP70                                                                                              |                                     | hsp70                       | 7.19   | 1.74   |
| Q6P3L3 | Heat shock protein 5                                                                                              |                                     | hsa5                        | 18.91  | 0.52   |
| Q6PGX4 | Heat shock cognate 71 kDa protein                                                                                 |                                     | hsc70                       | 21.12  | 1.31   |

|                                   |                                                                                             |           |        |       |
|-----------------------------------|---------------------------------------------------------------------------------------------|-----------|--------|-------|
| A5WWG8                            | Heat shock protein 90kDa alpha (Cytosolic), class B member 1                                | hsp90ab1  | 7.55   | *2.32 |
| A8WG05                            | Bactin2 protein                                                                             | bactin2   | 186.24 | 1.31  |
| Q08BV6                            | Novel protein (Zgc:92079)                                                                   | ckba      | 10.83  | 0.15  |
| Q68EH2                            | Zgc:91930                                                                                   | ak1       | 35.98  | 0.51  |
| Q7T306                            | Ckmb protein                                                                                | ckmb      | 128.37 | 1.51  |
| Q802Z4                            | Zgc:66156 protein (Fragment)                                                                | zgc:66156 | 47.02  | 0.86  |
| <b>Cardiac muscle contraction</b> |                                                                                             |           |        |       |
| A7E2K1                            | Tropomyosin alpha-1 chain                                                                   | tpm1      | 9.10   | 1.04  |
| Q5SPK5                            | Alpha-tropomyosin                                                                           | tpma      | 3.78   | 0.94  |
| Q5SPK6                            | Alpha-tropomyosin                                                                           | tpma      | 122.33 | 1.53  |
| Q5U3J6                            | Tropomyosin 4                                                                               | tpm4      | 4.04   | 2.09  |
| Q6P0W3                            | Novel protein similar to vertebrate tropomyosin 1 (Alpha) (TPM1, zgc:77592)                 | tpm3      | 7.72   | 1.41  |
| Q7ZVK9                            | Tpm1 protein                                                                                | tpm1      | 20.75  | 1.24  |
| Q7SXW1                            | Zgc:63734                                                                                   | tpm4b     | 28.49  | 0.61  |
| Q7T3F0                            | Tropomyosin 4                                                                               | tpm4      | 21.16  | 0.99  |
| Q803M1                            | Novel protein similar to vertebrate tropomyosin 1 (Alpha) (TPM1, zgc:77592)                 | tpm3      | 23.85  | 0.40  |
| Q6IQD7                            | Zgc:86810                                                                                   | tpm2      | 18.26  | 0.53  |
| <b>Monoxygenase activity</b>      |                                                                                             |           |        |       |
| A3KNI9                            | Ywhab1 protein                                                                              | ywhaba    | 23.26  | 1.29  |
| B8JLJ3                            | Tyrosine 3-monoxygenase/tryptophan 5-monoxygenase activation protein, iota polypeptide      | ywhai     | 11.79  | 0.55  |
| Q5CZQ1                            | Tyrosine 3-monoxygenase/tryptophan 5-monoxygenase activation protein, epsilon polypeptide 2 | ywhae2    | 15.11  | 1.16  |
| Q6P102                            | Tyrosine 3-monoxygenase/tryptophan 5-monoxygenase activation protein, beta polypeptide like | ywhabl    | 71.98  | 0.42  |
| Q7ZW20                            | Tyrosine 3-monoxygenase/tryptophan 5-monoxygenase activation protein, epsilon polypeptide 1 | ywhae1    | 22.16  | 0.47  |
| Q803M8                            | Tyrosine 3-monoxygenase/tryptophan 5-monoxygenase activation protein, zeta polypeptide      | ywhaqb    | 18.02  | 0.65  |
| <b>Oxidoreductase activity</b>    |                                                                                             |           |        |       |
| B0S7W4                            | Aldehyde dehydrogenase 9 family, member A1 like 1                                           | aldh9a1a  | 14.03  | 0.60  |
| Q4KME8                            | Vesicle amine transport protein 1 homolog (T californica)                                   | vat1      | 26.08  | 0.71  |

|        |                                                         | <b>DNA binding</b>               |        |       |
|--------|---------------------------------------------------------|----------------------------------|--------|-------|
| A7E2M8 | Histone H2B                                             | zgc:173585                       | 67.48  | 1.85  |
| O93584 | Y box binding protein 1                                 | ybx1                             | 12.31  | 0.75  |
|        |                                                         | <b>Calcium ion binding</b>       |        |       |
| Q2YDR5 | Actinin, alpha 2                                        | actn2                            | 0.76   | 5.48  |
| Q7SYE2 | Actinin, alpha 4                                        | actn4                            | 22.56  | 3.61  |
| Q8AX99 | Actn3b                                                  | actn3b                           | 44.21  | 0.88  |
| A2BHA3 | Creatine kinase, muscle                                 | ckm                              | 54.23  | 0.47  |
| D1GJ54 | Actn1 isoform c (Fragment)                              | actn1                            | 5.98   | 2.34  |
| Q804W0 | Parvalbumin 1                                           | pvalb1                           | 198.64 | 0.57  |
| Q7ZT36 | Parvalbumin 3                                           | pvalb3                           | 538.72 | 0.81  |
| Q6IMW7 | Parvalbumin 4                                           | pvalb4                           | 39.32  | 0.39  |
| Q6XG62 | Ictacalcin                                              | icn                              | 61.70  | 0.73  |
| Q9I8U8 | Fast skeletal muscle troponin C                         | tnnc                             | 31.42  | 1.14  |
|        |                                                         | <b>Lipid binding</b>             |        |       |
| B2ZHD8 | Fatty acid-binding protein 6                            | fabp6                            | 18.52  | 1.31  |
| Q66I80 | Fatty acid binding protein 11a                          | fabp11a                          | 19.26  | *0.36 |
| Q9I8N9 | Brain-type fatty acid binding protein                   | fabp7a                           | 11.22  | 0.39  |
| A2BGB3 | Apolipoprotein A-I                                      | apoa1                            | 13.83  | 1.98  |
| Q567B9 | Apolipoprotein A-IV (Fragment)                          | apoa4                            | 17.21  | 2.72  |
|        |                                                         | <b>Other or unknown activity</b> |        |       |
| A0JMJ1 | Scinderin like a                                        | scin1a                           | 16.08  | 2.22  |
| B0S564 | Novel protein similar to vertebrate procollagen-proline | p4hb                             | 16.20  | 0.85  |
| B0UYN4 | Novel protein (Zgc:162944)                              | DKEY-57A22.8                     | 4.02   | 2.29  |
| B3DFP9 | Zgc:193613                                              | apoa2                            | 51.57  | *1.72 |
| B3DG37 | Ba1 protein                                             | ba1                              | 50.50  | 1.65  |
| Q1JQ69 | Hbaa1 protein                                           | hbaa1                            | 93.74  | 0.69  |
| B7ZVL6 | Putative uncharacterized protein                        | tnnt3b                           | 79.49  | 0.58  |
| B8JL43 | Transferrin-a                                           | tfa                              | 37.09  | 1.32  |
| Q32PU7 | Zgc:123194                                              | zgc:123194                       | 21.88  | 0.96  |

|        |                                     |           |       |        |
|--------|-------------------------------------|-----------|-------|--------|
| Q4JIY5 | Elongation factor 1-alpha           | ef1a      | 15.86 | 2.46   |
| Q503C7 | Phosphorylase                       | pygma     | 31.55 | 0.76   |
| Q5RKM9 | Phosphorylase                       | pygl      | 7.56  | 4.45   |
| Q8UUZ6 | Alpha A crystallin                  | cryaa     | 13.04 | 0.93   |
| Q52JI3 | Beta B3-crystallin                  | crybb3    | 15.22 | 0.56   |
| Q52JI4 | Beta B2-crystallin                  | crybb2    | 11.43 | *1.82  |
| Q5BJ14 | Zgc:110761                          | mybpc2b   | 24.50 | 1.38   |
| Q5PR62 | Zgc:103458                          | tnni1b    | 5.50  | 1.89   |
| Q6DHP2 | Troponin I, skeletal, fast 2b.2     | tnni2b.2  | 23.01 | 2.78   |
| Q6DHU6 | Troponin I, skeletal, fast 2a.3     | tnni2a.3  | 50.41 | 0.67   |
| Q6IQ92 | Troponin 1                          | tnni1a1   | 4.48  | 1.27   |
| Q6PBJ8 | Peptidyl-prolyl cis-trans isomerase | fkbp1aa   | 22.04 | **0.19 |
| Q6PC53 | Peptidyl-prolyl cis-trans isomerase | ppial     | 47.77 | 0.74   |
| Q6TLG8 | Ribosomal protein S3                | rps3      | 6.40  | 1.32   |
| Q7ZUI4 | Thioredoxin                         | zgc:56493 | 12.73 | 0.81   |
| Q9DDU5 | Glutathione S-transferase pi        | gstp1     | 17.87 | 0.69   |

\* p-value<0.05

\*\* p-value<0.01

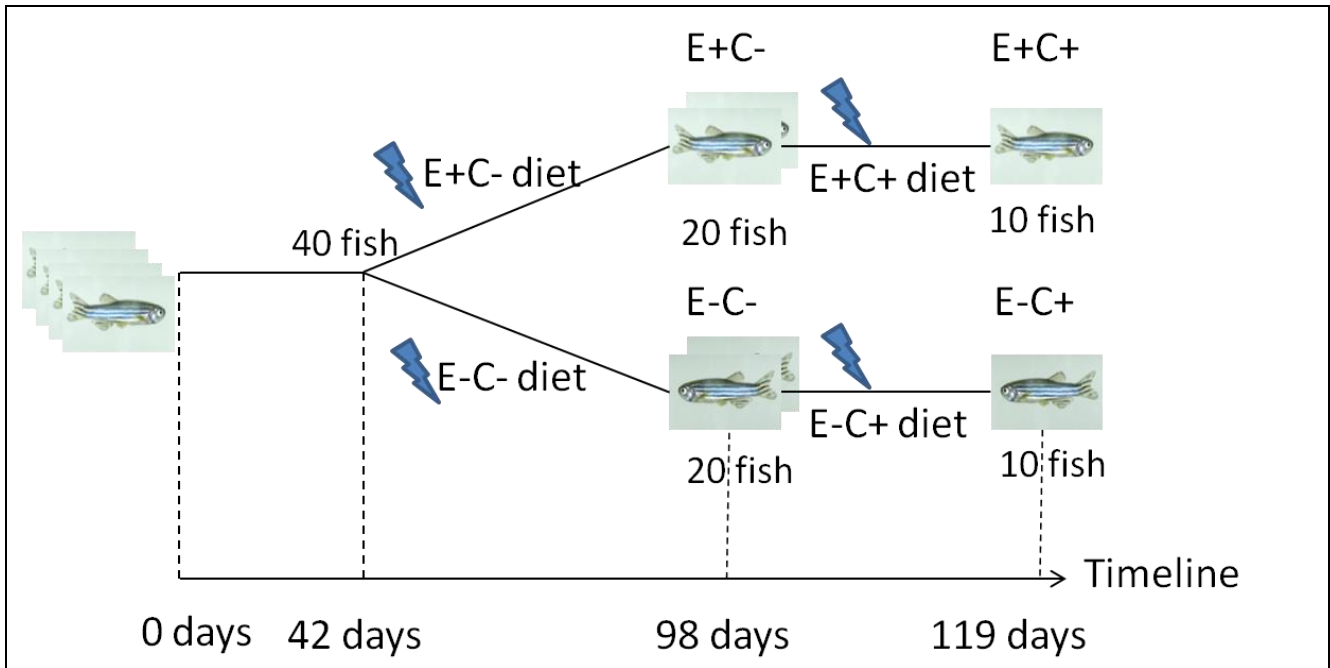

**Supplementary Figure S1.** Design of the feeding experiment.



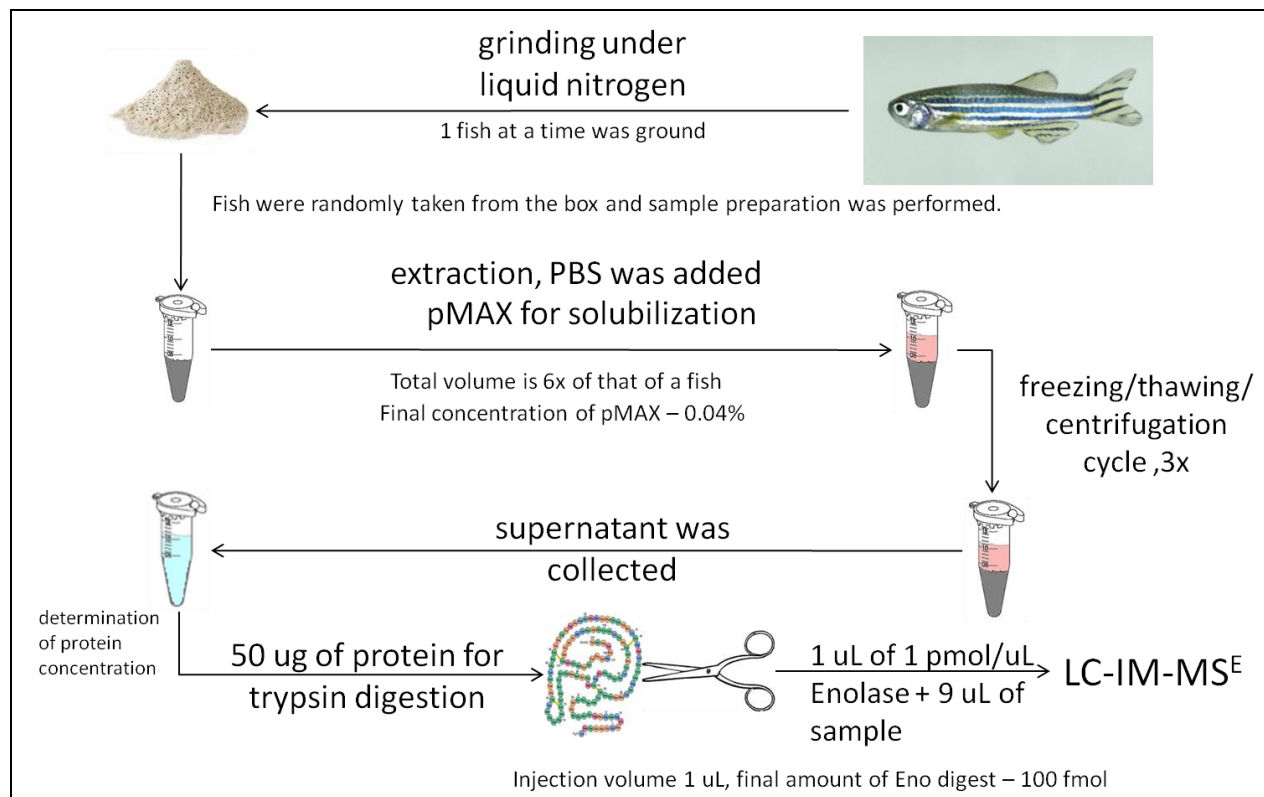

**Supplemental Figure S2.** Workflow used for preparing the samples for the label-free “bottom up” quantitative proteomics study.

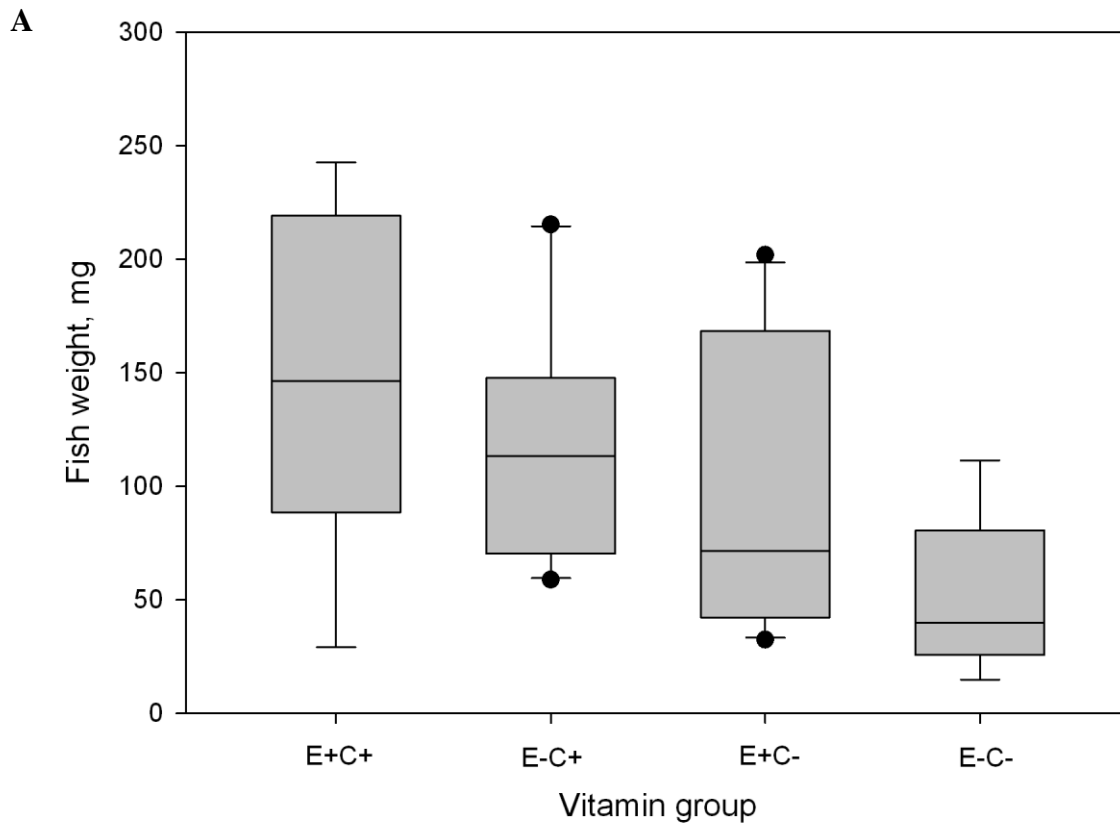

**B**

|      | E+C+ | E-C+ | E+C- | E-C- |
|------|------|------|------|------|
| E+C+ | 1.00 |      |      |      |
| E-C+ | 1.29 | 1.00 |      |      |
| E+C- | 1.68 | 1.30 | 1.00 |      |
| E-C- | 3.02 | 2.34 | 1.79 | 1.00 |

**Supplementary Figure S3.** Fish characteristics dependent on the vitamin regime fed.

A) Boxplots of distribution of fish body weight.

B) Ratios of median growth rate between vitamin groups.

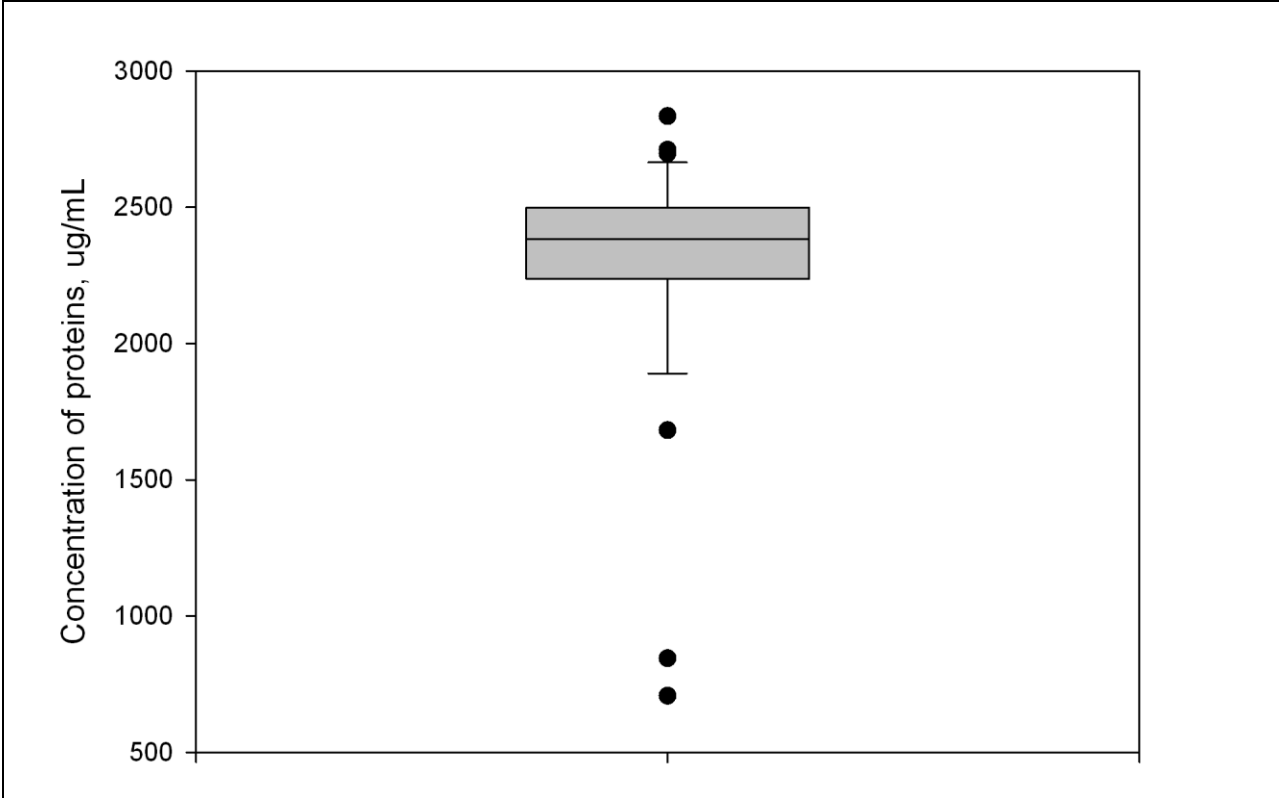

**Supplemental Figure S4.** Boxplot of the distribution of the total protein concentration after extraction and lysis.

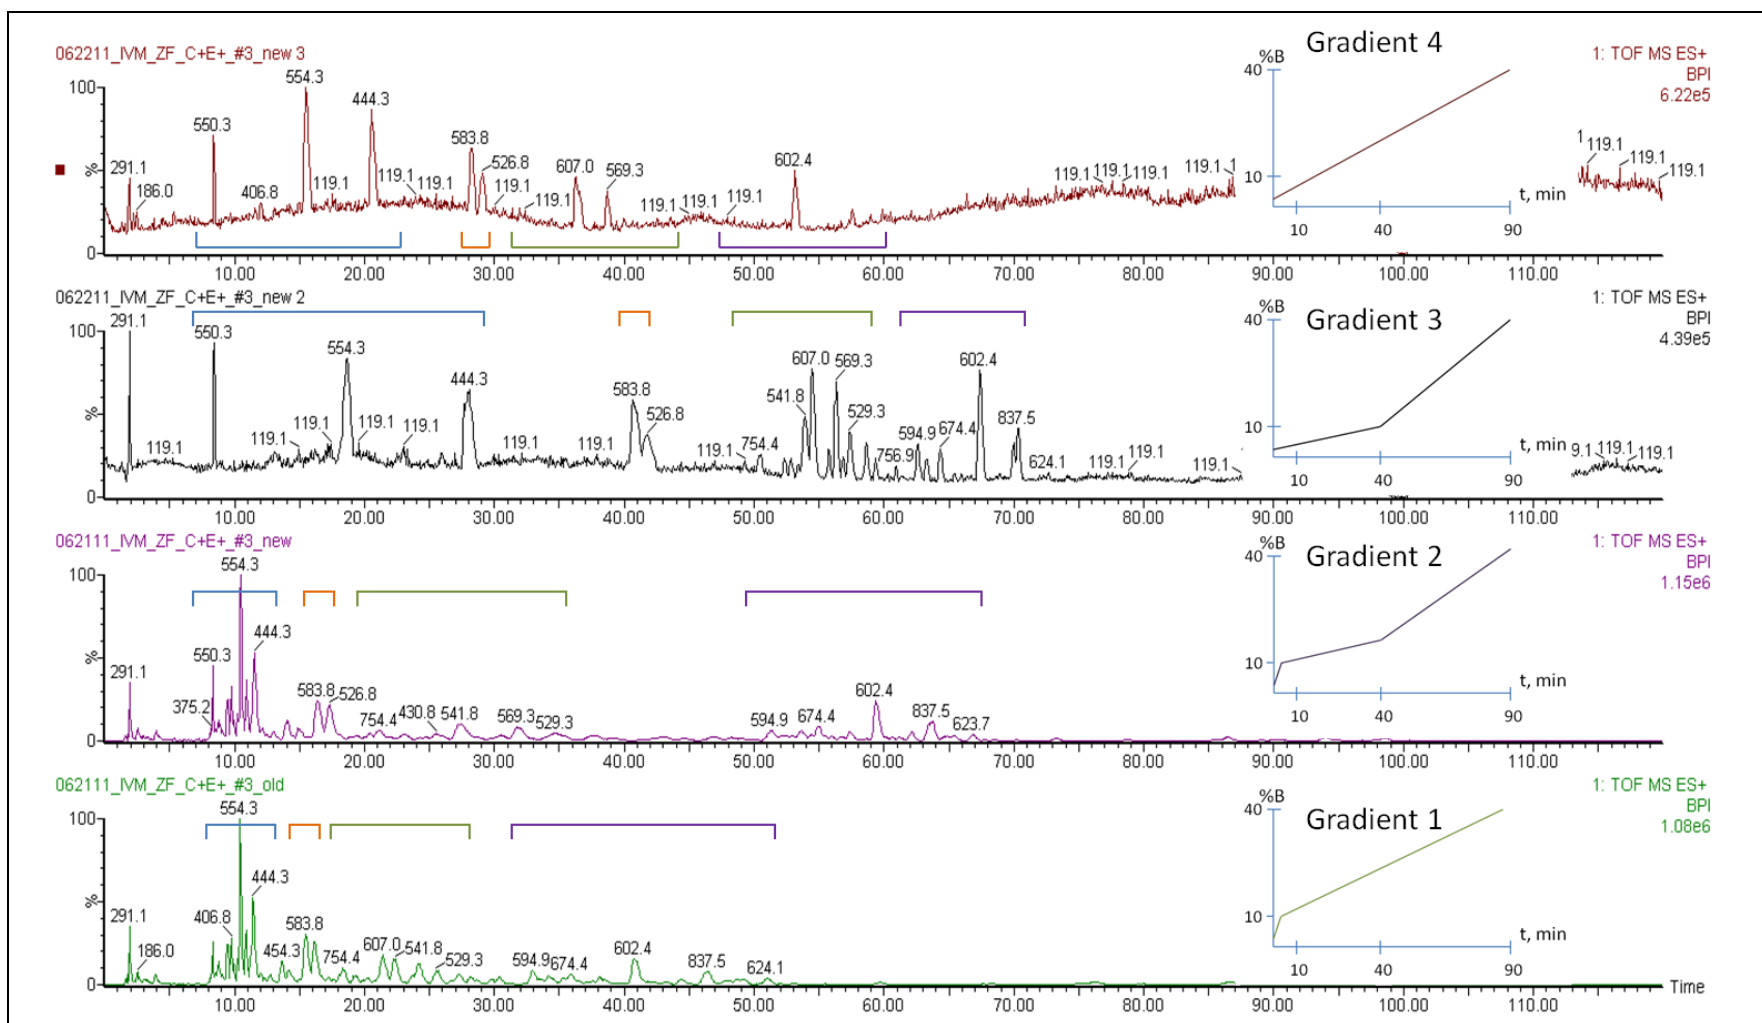

Supplementary Figure S5. Gradient profiles with respective base peak chromatograms.

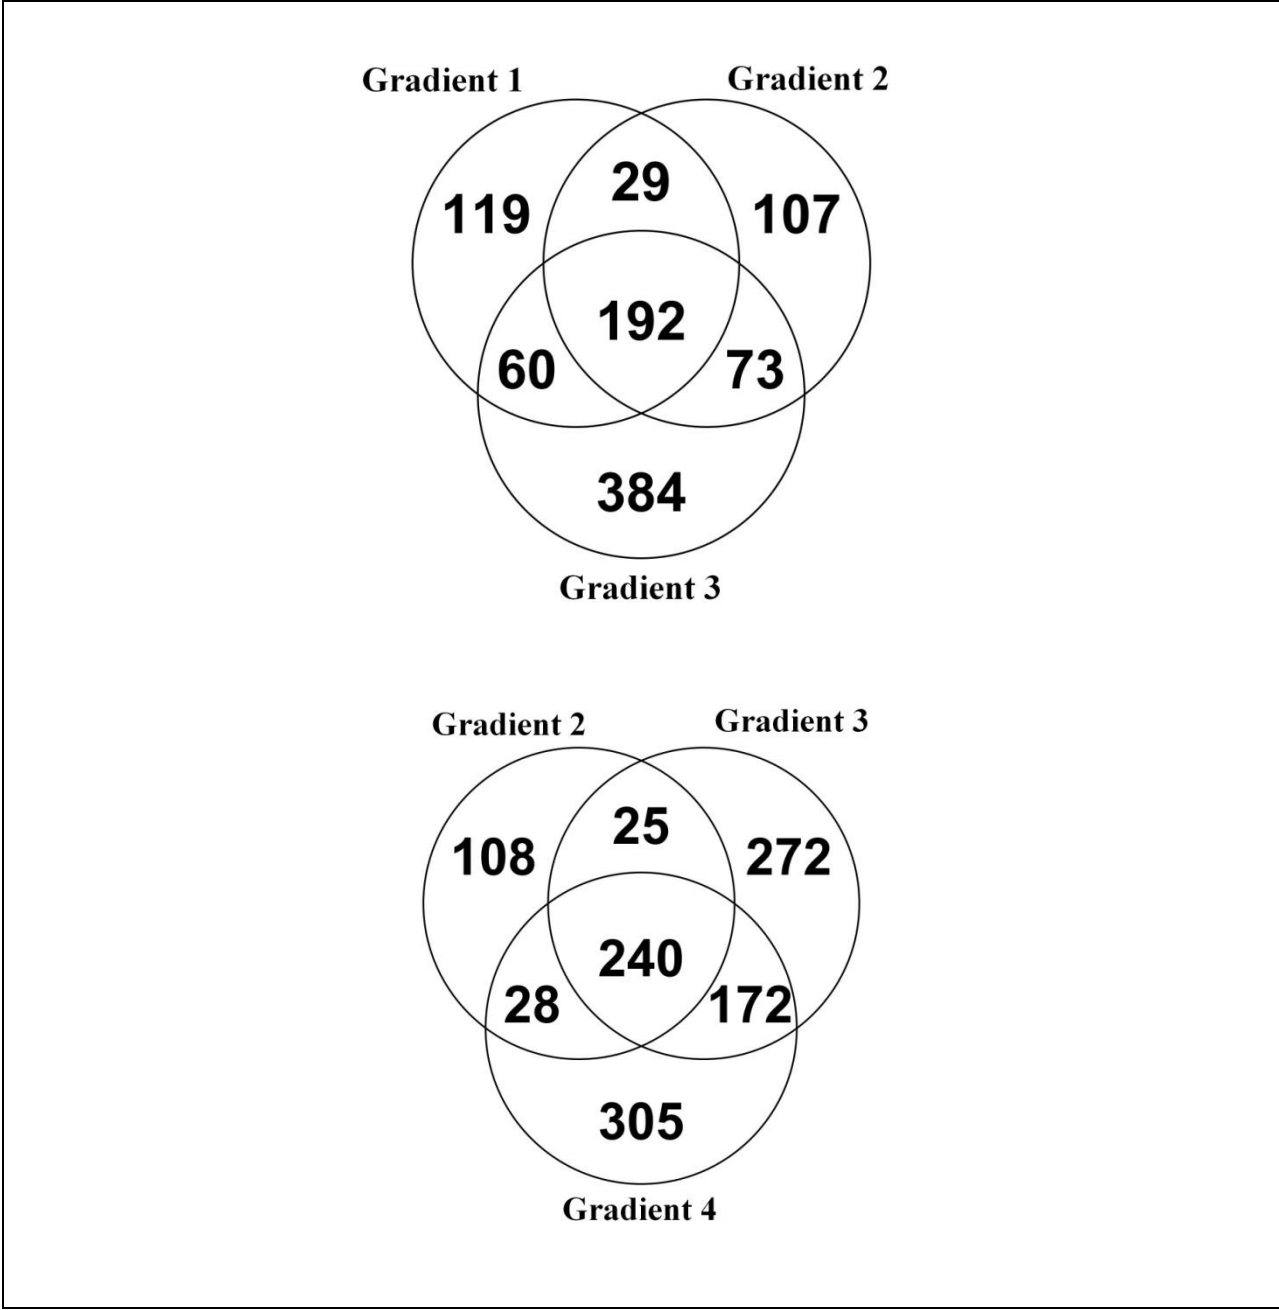

**Supplementary Figure S6.** Venn's diagrams comparing the number of peptides identified by LC-IM-MS<sup>E</sup>.

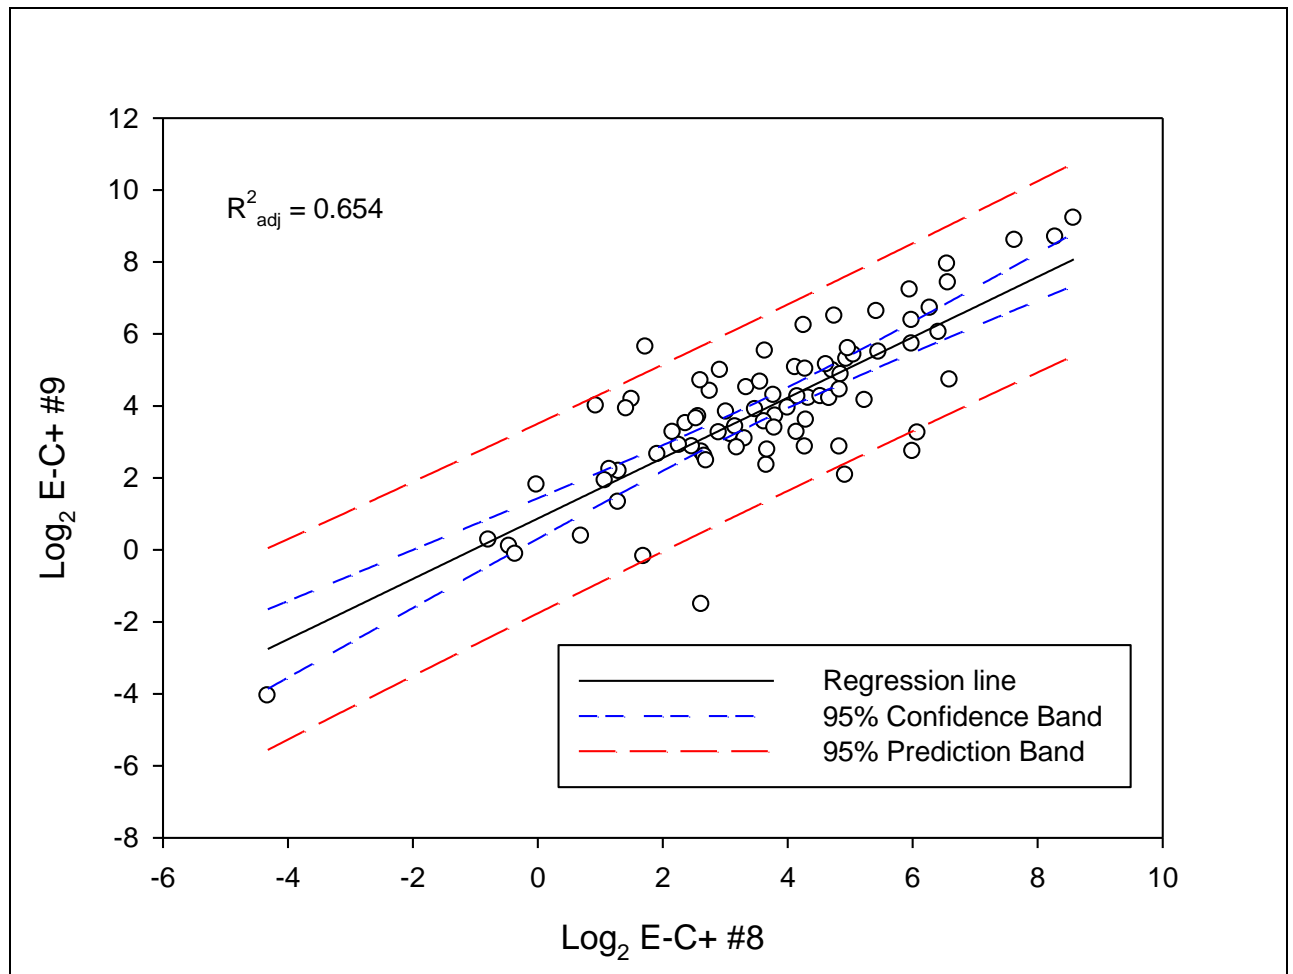

**SupplementaryFigure S7.** Correlation plot between E-C+ sample 9 and E-C+ sample 8.

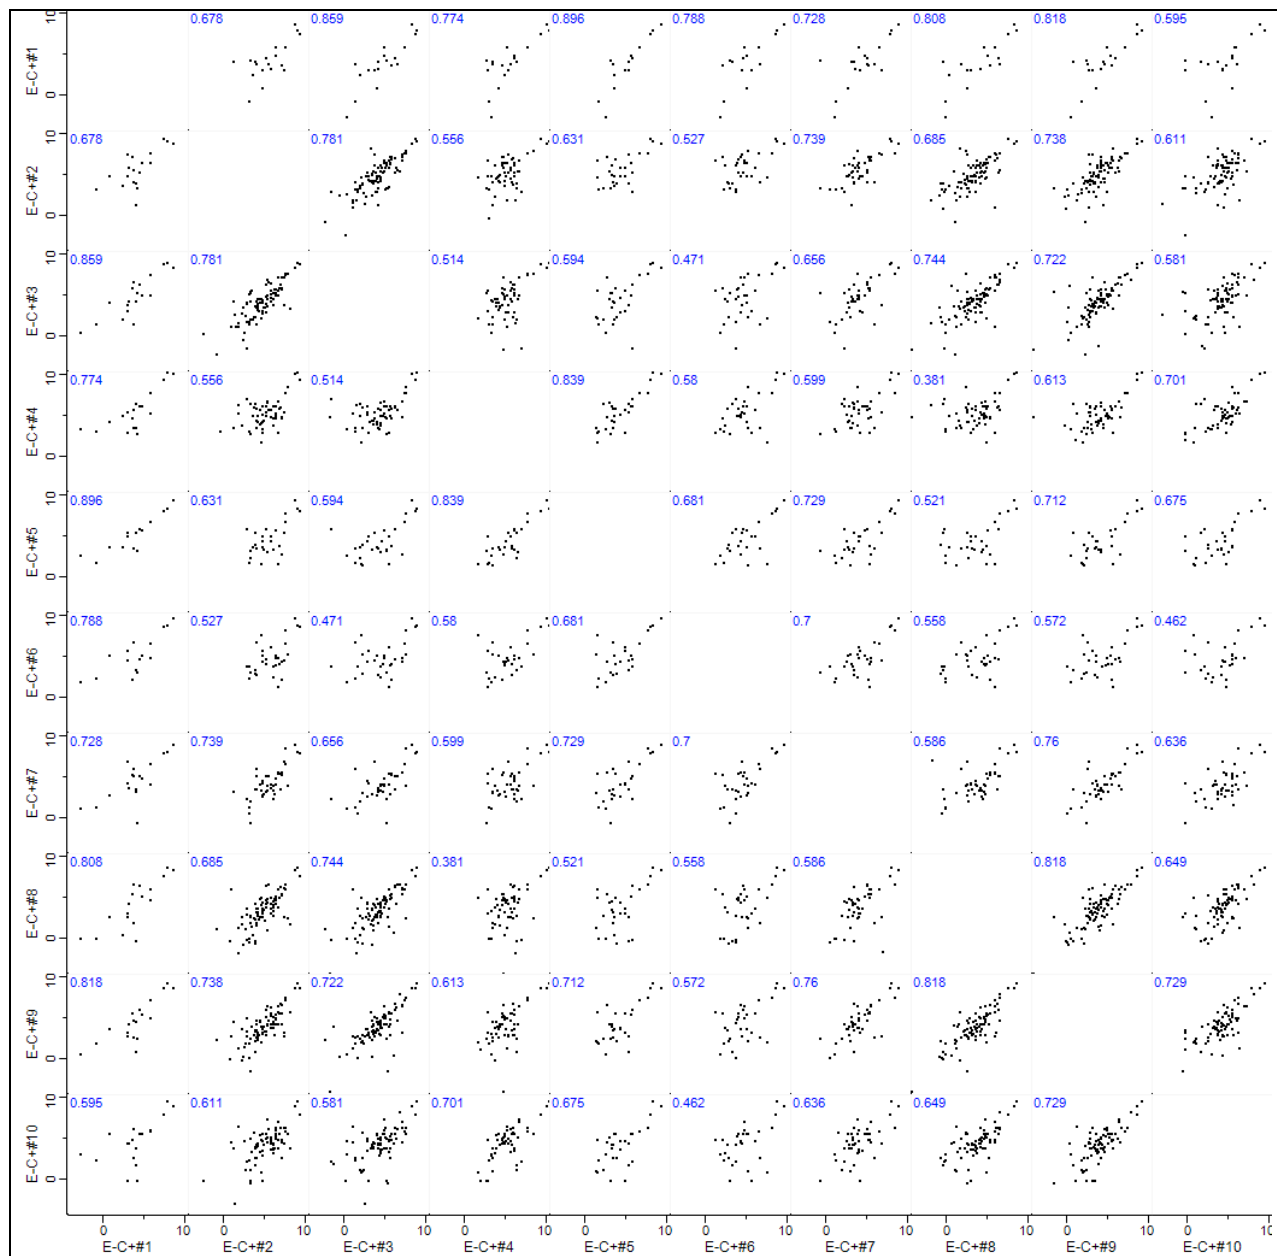

**Supplementary Figure S8.** Correlation plot matrix of the E-C+ group.

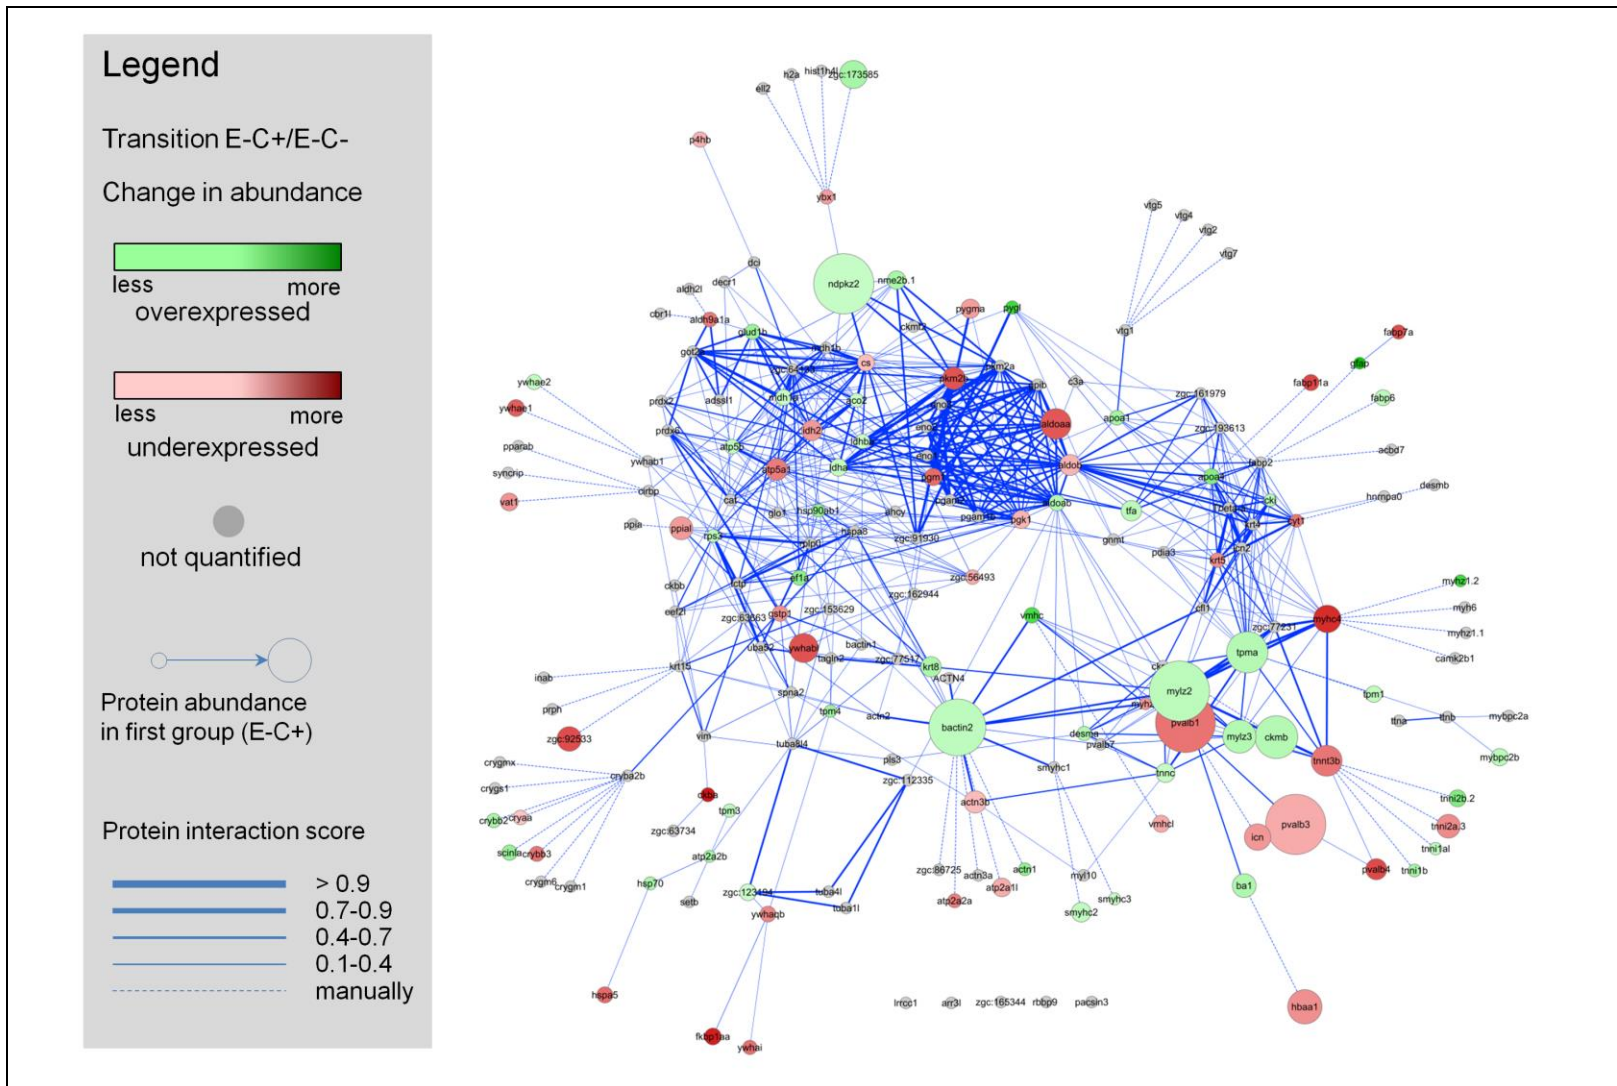

**Supplementary Figure S9.** The responsive protein network for the vitamin transition C+/C- with deficient vitamin E status.
